# Supplementary material for: Paralog buffering contributes to the variable essentiality of genes in cancer cell lines
Source: PubMed Central journal article supplement (PMC6834290; doi:10.1371/journal.pgen.1008466), 2019-10-25

# Supplemental Figure 1

A

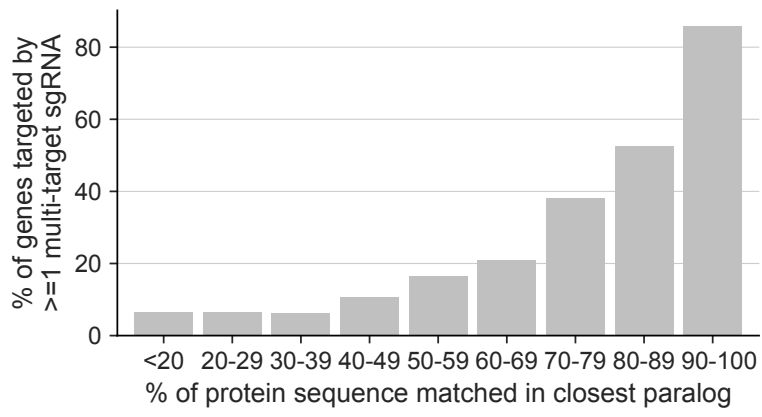

C

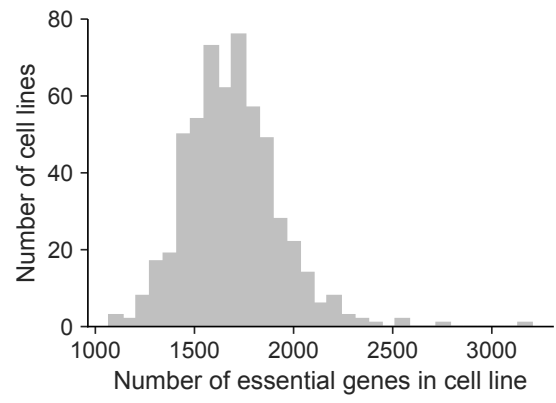

B

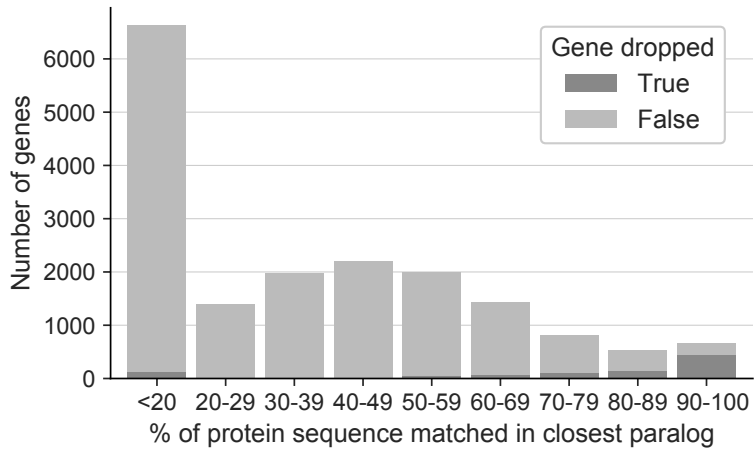

Supplement: pgen.1008466.s006.pdf [file pgen.1008466.s006.pdf]
