# Supplementary material for: Paralog buffering contributes to the variable essentiality of genes in cancer cell lines
Source: PubMed Central journal article supplement (PMC6834290; doi:10.1371/journal.pgen.1008466), 2019-10-25

Supplemental Figure 3 (threshold = -0.4)

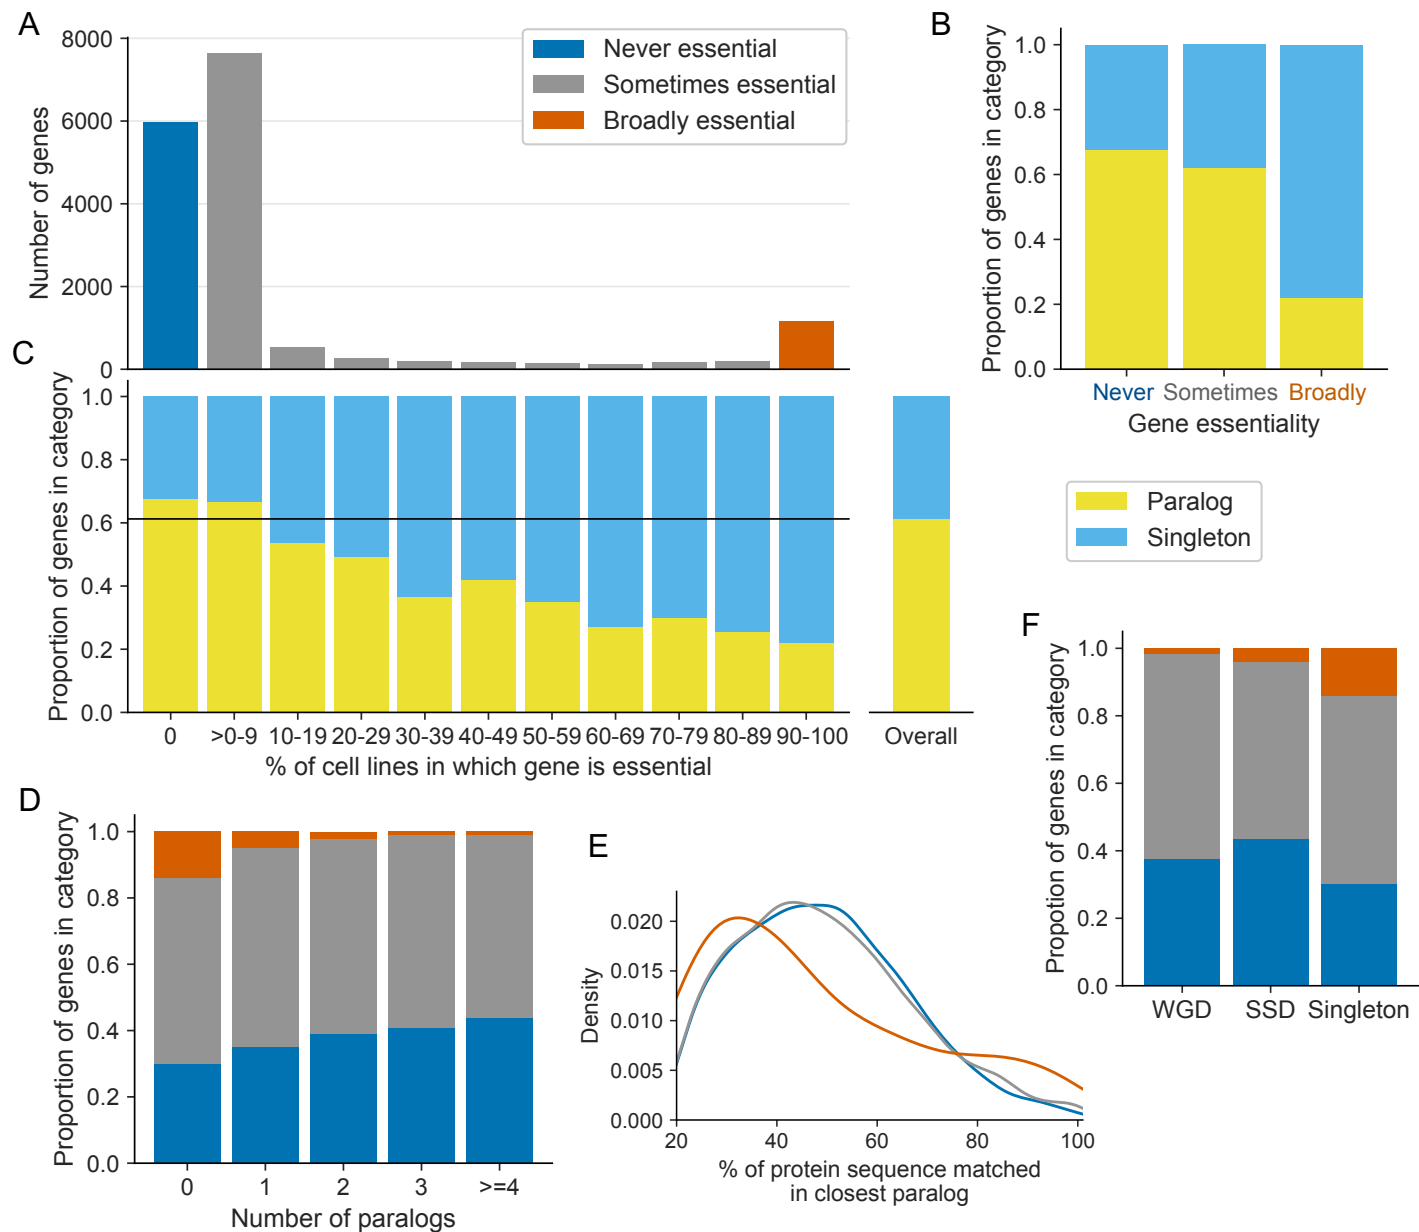

Supplement: pgen.1008466.s008.pdf [file pgen.1008466.s008.pdf]
